# Supplementary material for: Time Course of Relapse Following Acute Treatment for Anorexia Nervosa
Source: Atypon-hosted journal article supplement (doi:10.1176/appi.ajp.2021.21010026), 2021-06-22
Supplement: appi.ajp.2021.21010026.ds001.pdf [file appi.ajp.2021.21010026.ds001.pdf]

## Figures

The analyses described in Figures S1 and S2 were based on the criterion that all 53 patients who failed to complete the full 52-week study were considered to have relapsed. This criterion was used in the primary analysis in the original study (Walsh et al., 2006).

**FIGURE S1. Probability of relapse in the subsequent 60 days versus time after study entry<sup>a</sup>**

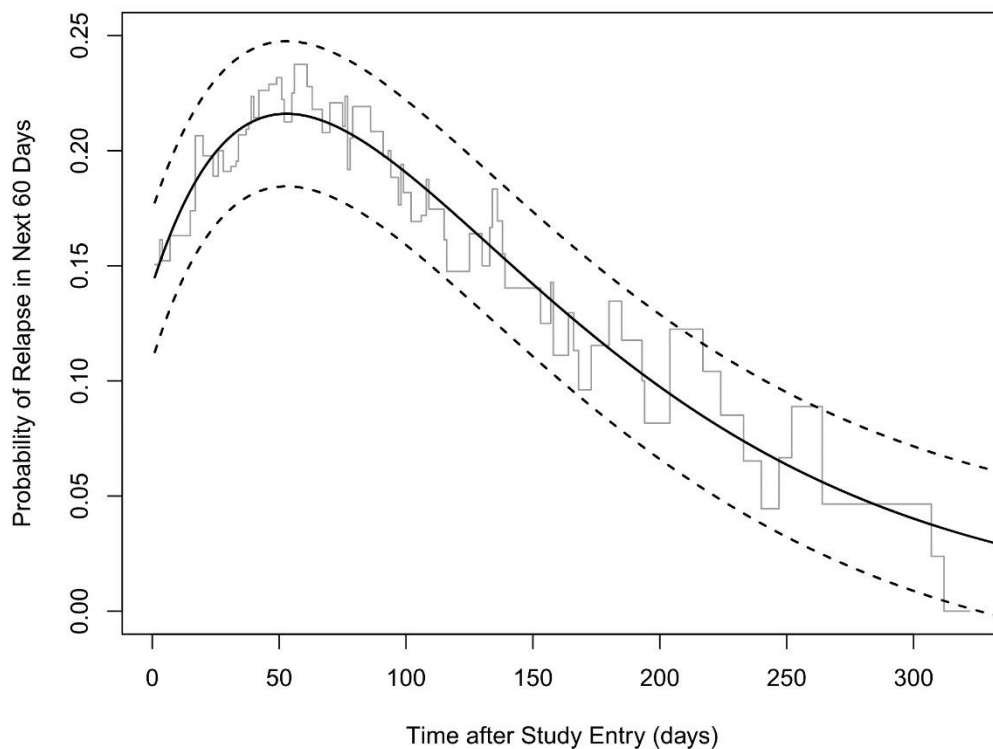

<sup>a</sup> The line in gray is the step function showing the nonparametric Kaplan Meier estimator. The fitted gamma function is shown by the black line; the dashed lines show the 95% confidence intervals. The fitted parameters are  $\hat{\alpha} = -0.0125$  (95% CI:  $-0.0129, -0.0122$ ),  $\hat{\gamma} = 0.0073$  (95% CI:  $0.0071, 0.0076$ ), and  $\hat{c} = -27.03$  (95% CI:  $-30.35, -23.72$ ). At day 0, the probability of relapse within next 60 days was  $14.3\% \pm 3.3\%$ . The maximum risk of relapse was on day 53 when the probability was  $21.7\% \pm 3.2\%$ . After day 272, the relapse risk declined to below 5%.

**FIGURE S2. Probability of relapse in the subsequent 90 days versus time after study entry<sup>a</sup>**

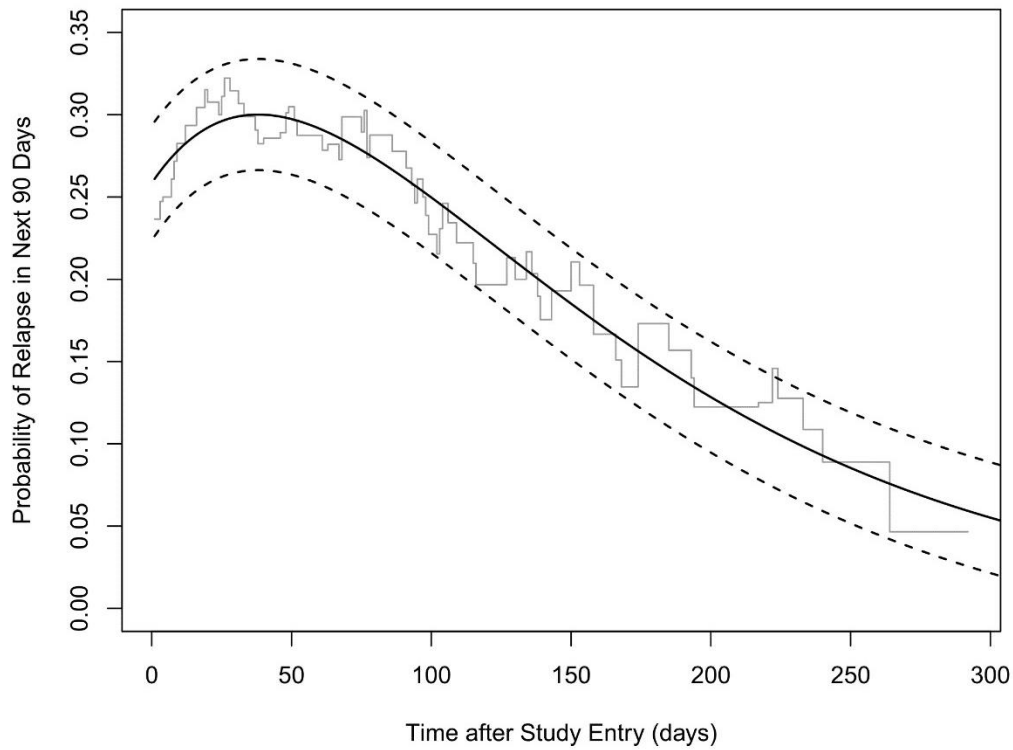

<sup>a</sup> The line in gray is the step function showing the nonparametric Kaplan Meier estimator. The fitted gamma function is shown by the black line; the dashed lines show the 95% confidence intervals. The fitted parameters are  $\hat{\alpha} = -0.0119$  (95% CI:  $-0.0122, -0.0115$ ),  $\hat{\gamma} = 0.0097$  (95% CI:  $0.0093, 0.0100$ ), and  $\hat{c} = -46.20$  (95% CI:  $-50.88, -41.52$ ). At day 0, the probability of relapse within next 90 days was  $26.1\% \pm 3.5\%$ . The maximum risk of relapse was on day 38 when the probability was  $30.0\% \pm 3.4\%$ . After day 311, the relapse risk declined to below 5%.

### **Additional Statistical Analyses**

We compared the estimated peak relapse rates over the next 90 days for the following: relapse judged clinically at the time of study withdrawal versus any withdrawal viewed as a relapse, site (New York vs Toronto), and subtype (binge-eating/purging vs restricting). The peak risks of relapse for the two criteria for judging relapse (dropouts classified clinically versus all dropouts classified as having relapsed) did not differ significantly ( $26.8 \pm 1.4(\text{SD})$  vs  $30.0 \pm 1.7\%$ ,  $p=0.07$ ). The peak risk of relapse at the New York site was significantly greater than that at the Toronto site ( $43.5 \pm 2.4$  vs  $15.7 \pm 3.0\%$ ,  $p<0.001$ ), and the peak risk of relapse for patients with the binge-eating/purging subtype was significantly greater than for patients with the restricting subtype ( $34.4 \pm 3.4$  vs  $21.3 \pm 2.0\%$ ,  $p<0.001$ ). The days of peak relapse differed significantly for all these comparisons. For study withdrawal judged clinically versus all withdrawals classified as having relapsed, the days of peak relapse were  $54.3 \pm 0.4$  vs  $38.1 \pm 1.8$  days,  $p<0.001$ . For New York versus Toronto, the days of peak relapse were  $45.7 \pm 0.3$  vs  $99.6 \pm 2.3$  days,  $p<0.001$ . For the binge-eating/purging versus the restricting subtype, the days of peak relapse were  $60.9 \pm 1.3$  vs  $49.5 \pm 3.4$  days,  $p<0.002$ .
